# Supplementary material for: In Vitro Investigations of miR-33a Expression in Estrogen Receptor-Targeting Therapies in Breast Cancer Cells
Source: MDPI journal article supplement (doi:10.3390/cancers13215322), 2021-10-23
Supplement: s1 [file s1]

# Supplementary Materials: In Vitro Investigations of miR-33a Expression in Estrogen Receptor-Targeting Therapies in Breast Cancer Cells

Pelin Ozfiliz-Kilbas, Ozlem Sonmez, Pinar Obakan-Yerlikaya, Ajda Coker-Gurkan, Narcin Palavan-Unsal, Pinar Uysal-Onganer and Elif Damla Arisan

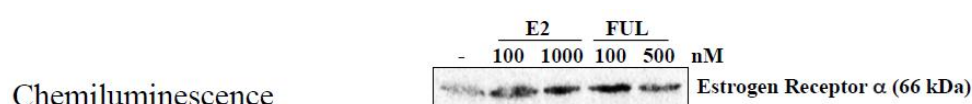

Raw image

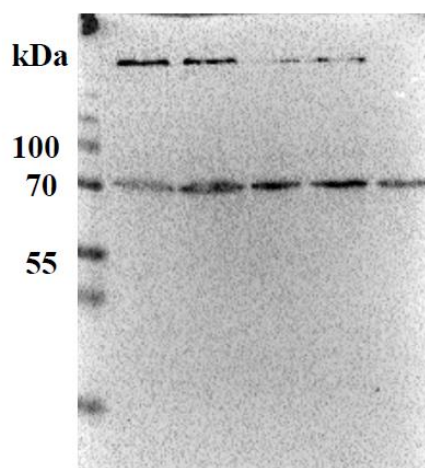

**IB: Estrogen Receptor  $\alpha$  (66 kDa)**

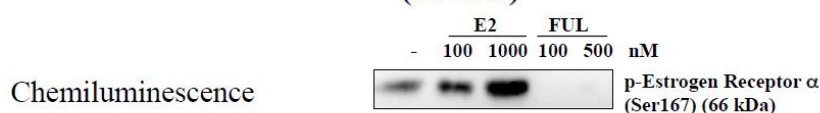

Raw image

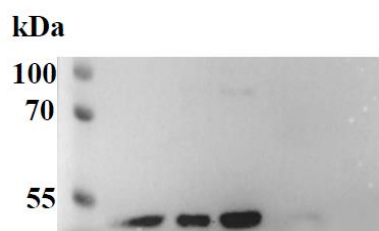

**IB: Estrogen Receptor  $\alpha$  Ser 167 (66 kDa)**

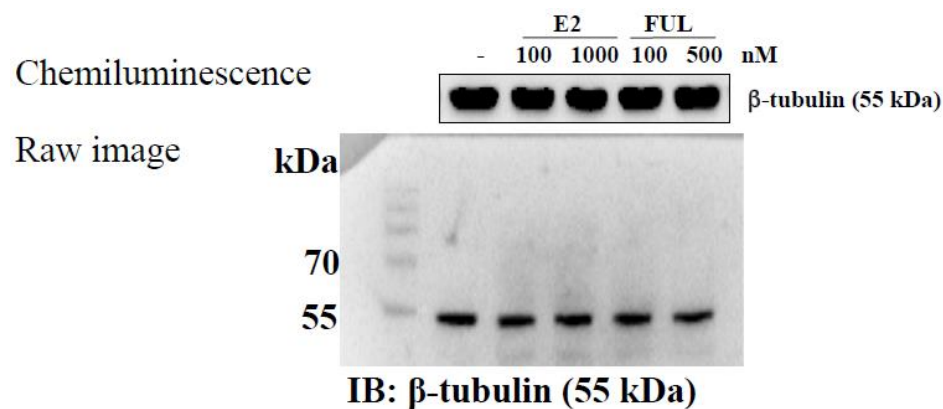

Figure S1. Uncropped Western Blot Figures of Figure 1d.

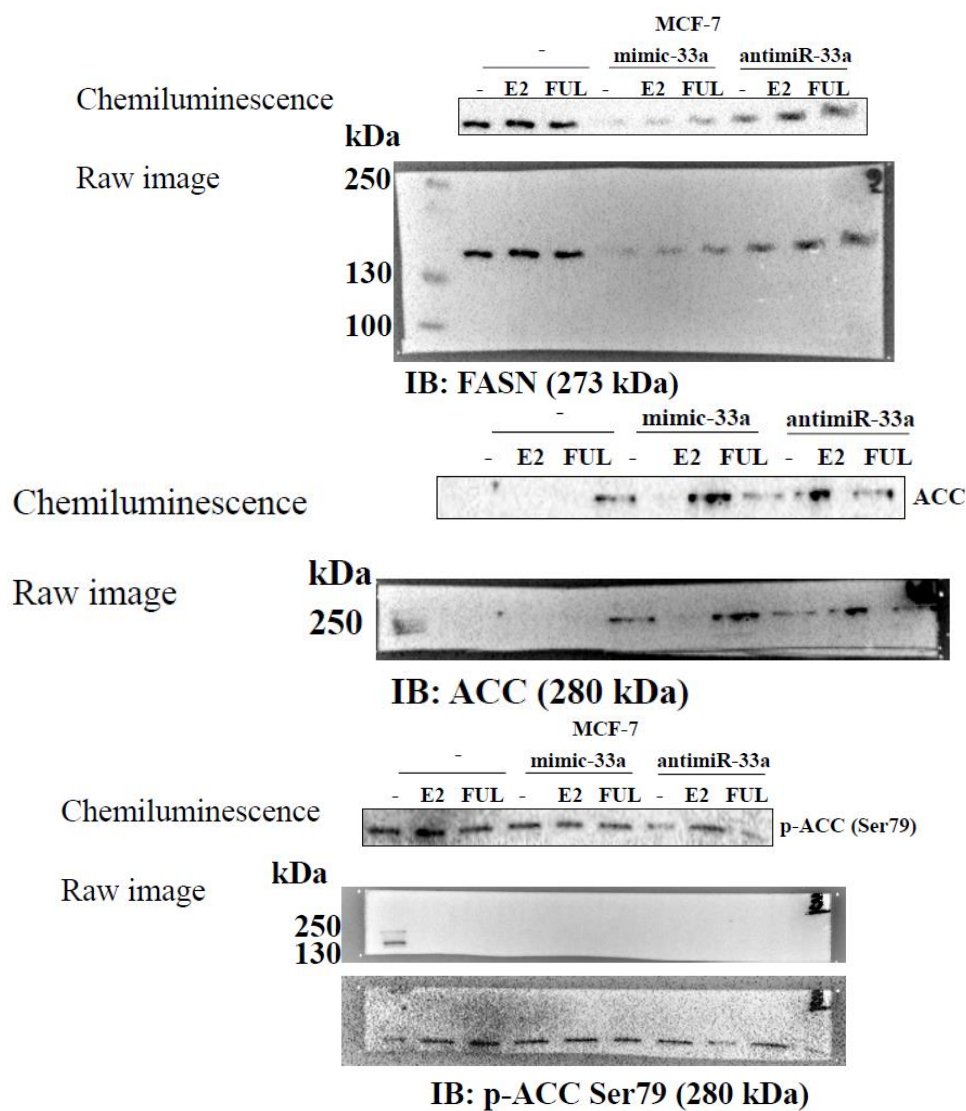

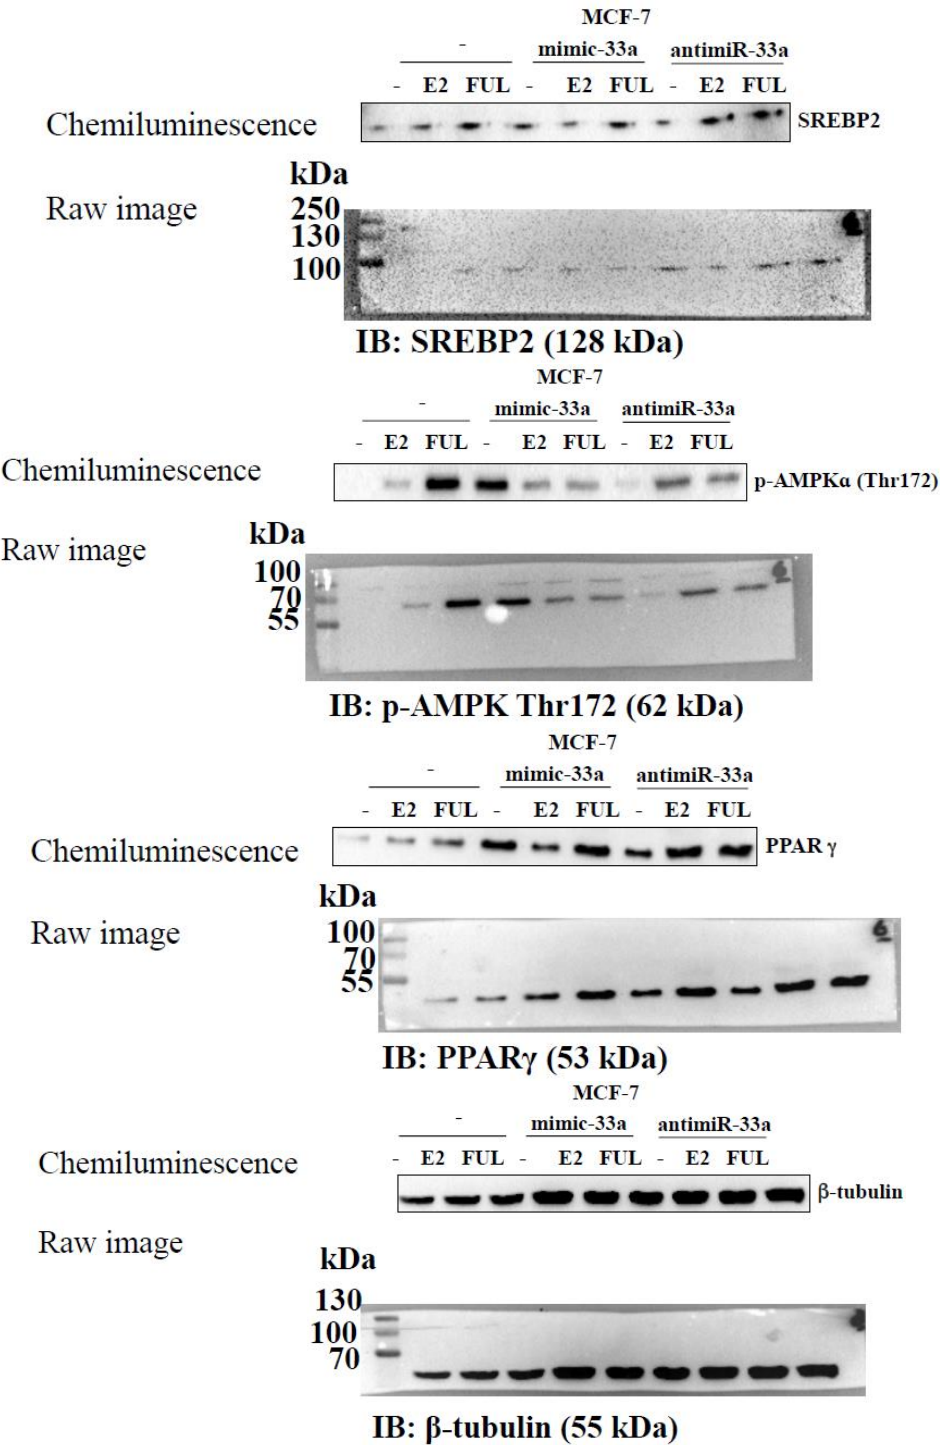

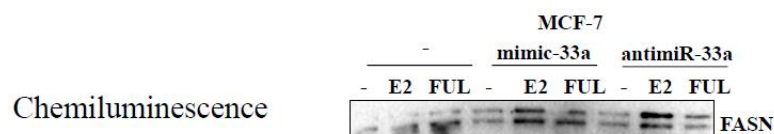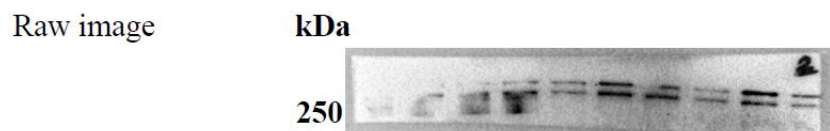

IB: FASN (273 kDa)

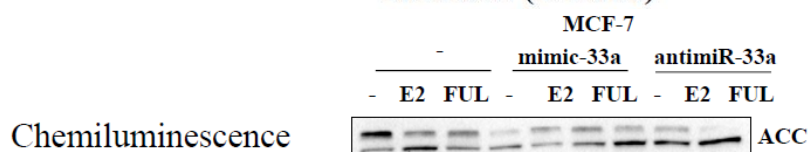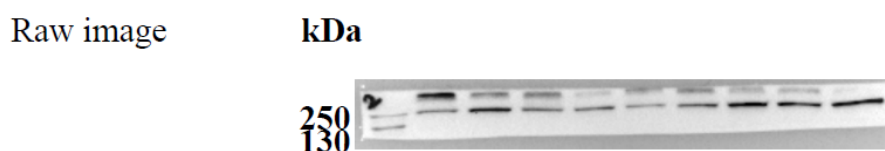

IB: ACC (280 kDa)

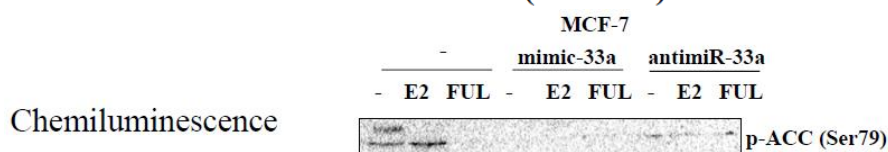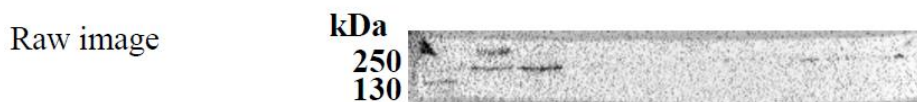

IB: p-ACC Ser79 (280 kDa)

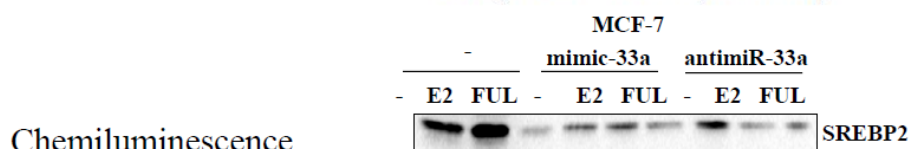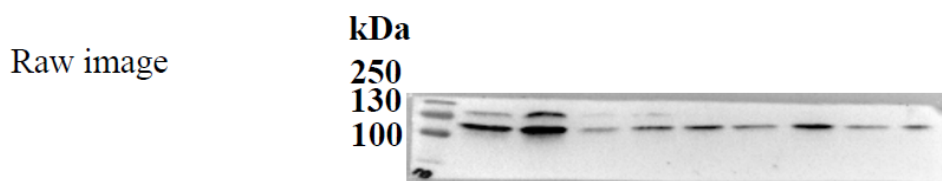

IB: SREBP2 (128 kDa)

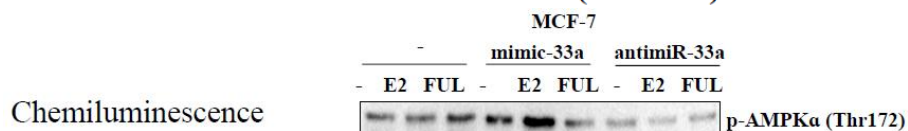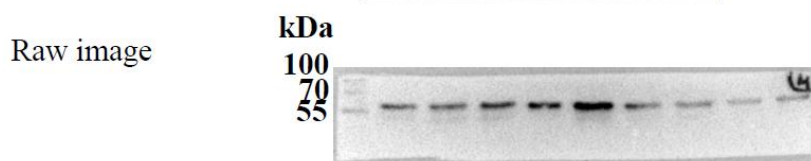

IB: p-AMPK (62 kDa)

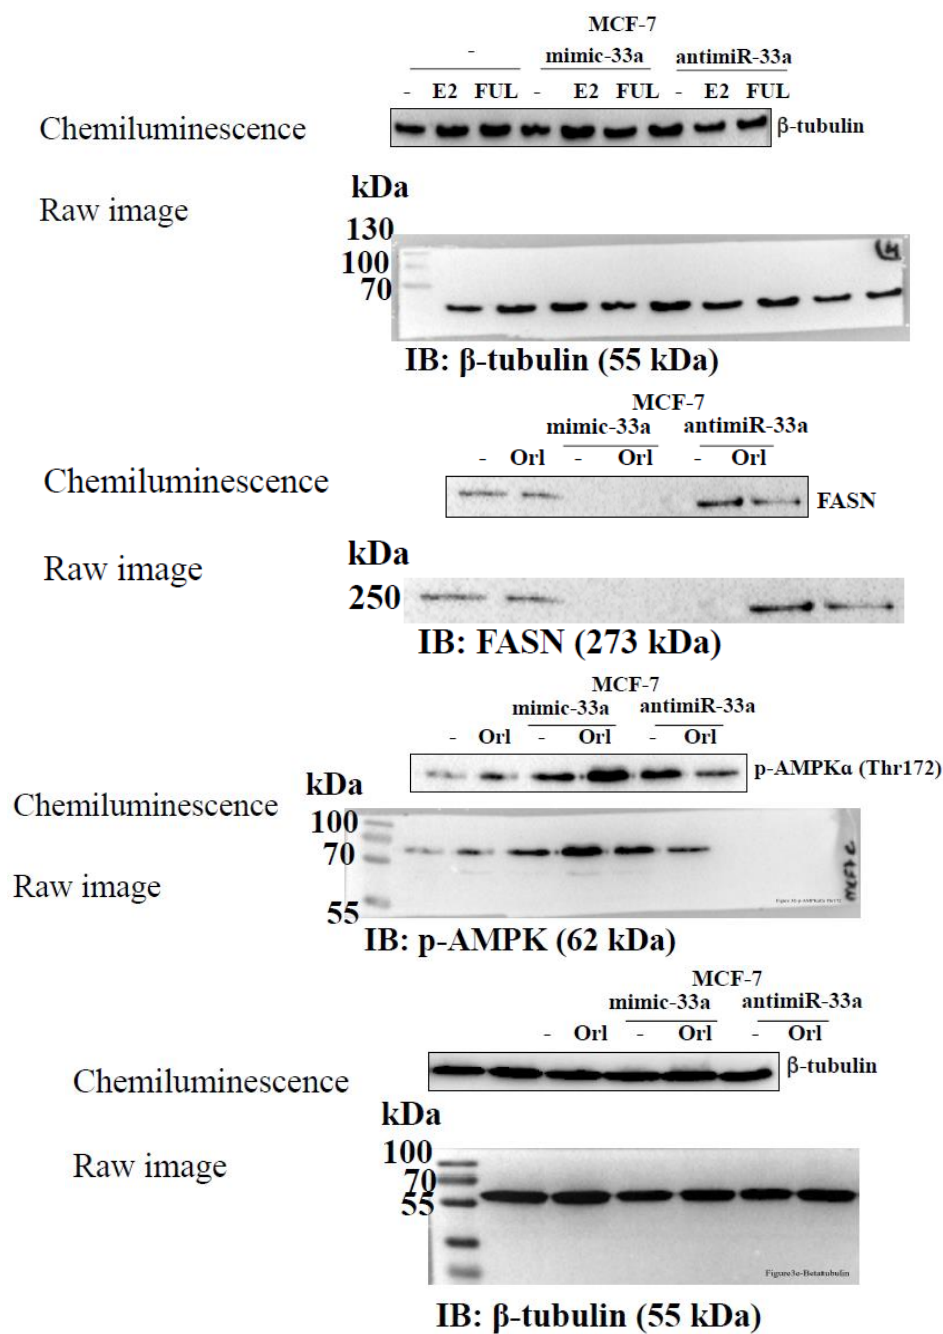

Figure S2. Uncropped Western Blot Figures of Figure 3.
